# Supplementary material for: Sulfate-based anionic diblock copolymer nanoparticles for efficient occlusion within zinc oxide
Source: Royal Society of Chemistry journal article supplement (doi:10.1039/c5nr00535c), 2015-01-01
Supplement: c5nr00535c1.pdf [file c5nr00535c1.pdf]

Supporting Information for

**Sulfate-based Anionic Diblock Copolymer Nanoparticles  
for Efficient Occlusion within Zinc Oxide**

Y. Ning, L. A. Fielding, T. S. Andrews, D. J. Gowney, S. P. Armes\*

Department of Chemistry, University of Sheffield, Brook Hill, Sheffield, South Yorkshire, S3  
7HF, UK.

\* Author to whom correspondence should be addressed (S.P.Armes@sheffield.ac.uk).

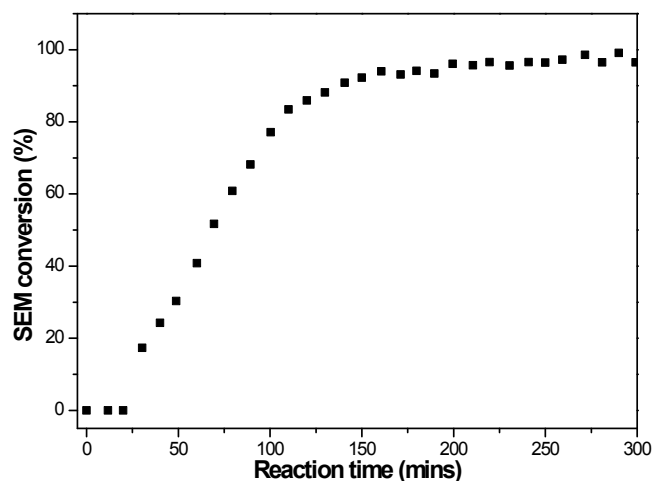

**Figure S1.** Conversion vs time curve calculated from  $^1\text{H}$  NMR spectra ( $\text{D}_2\text{O}$ ) for the RAFT synthesis of PSEM macro-CTA in water at  $70^\circ\text{C}$  (target DP = 60; CTA/initiator molar ratio = 5.0).

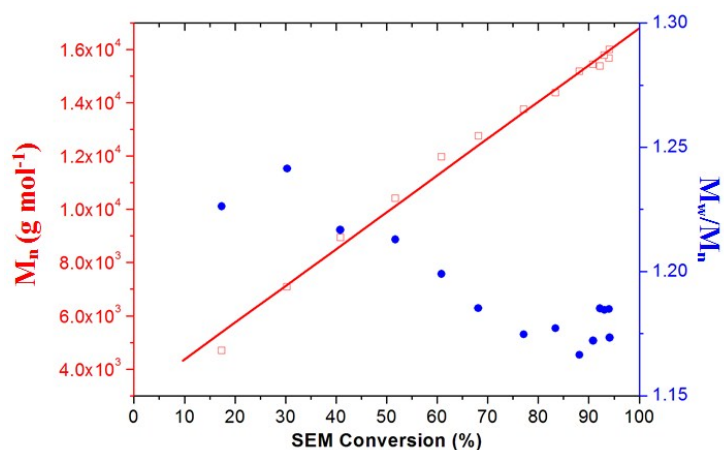

**Figure S2.** Evolution of the number-average molecular weight  $M_n$  (calculated using PEO standards) and polydispersity ( $M_w/M_n$ ) of PSEM macro-CTA (target DP = 60; CTA/initiator molar ratio = 5.0) with monomer conversion as judged by aqueous GPC.

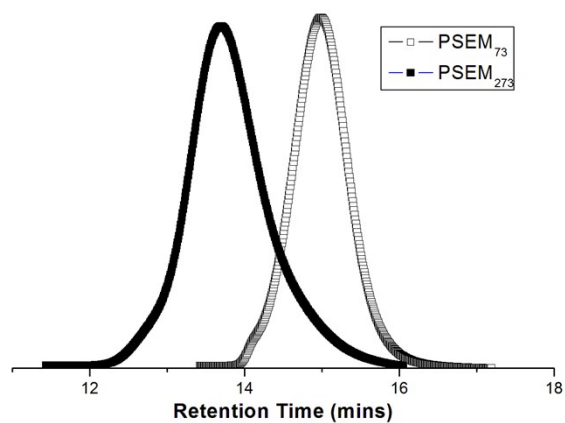

**Figure S3.** Aqueous GPC curves demonstrating the successful chain extension of  $\text{PSEM}_{73}$  using SEM monomer. This ‘self-blocking’ experiment was conducted in aqueous solution at 70 °C using ACVA initiator ( $\text{PSEM}_{73}$  macro-CTA/ACVA molar ratio = 5.0). This demonstrates high blocking efficiency for this  $\text{PSEM}_{73}$  macro-CTA, which implies high RAFT chain-end fidelity.

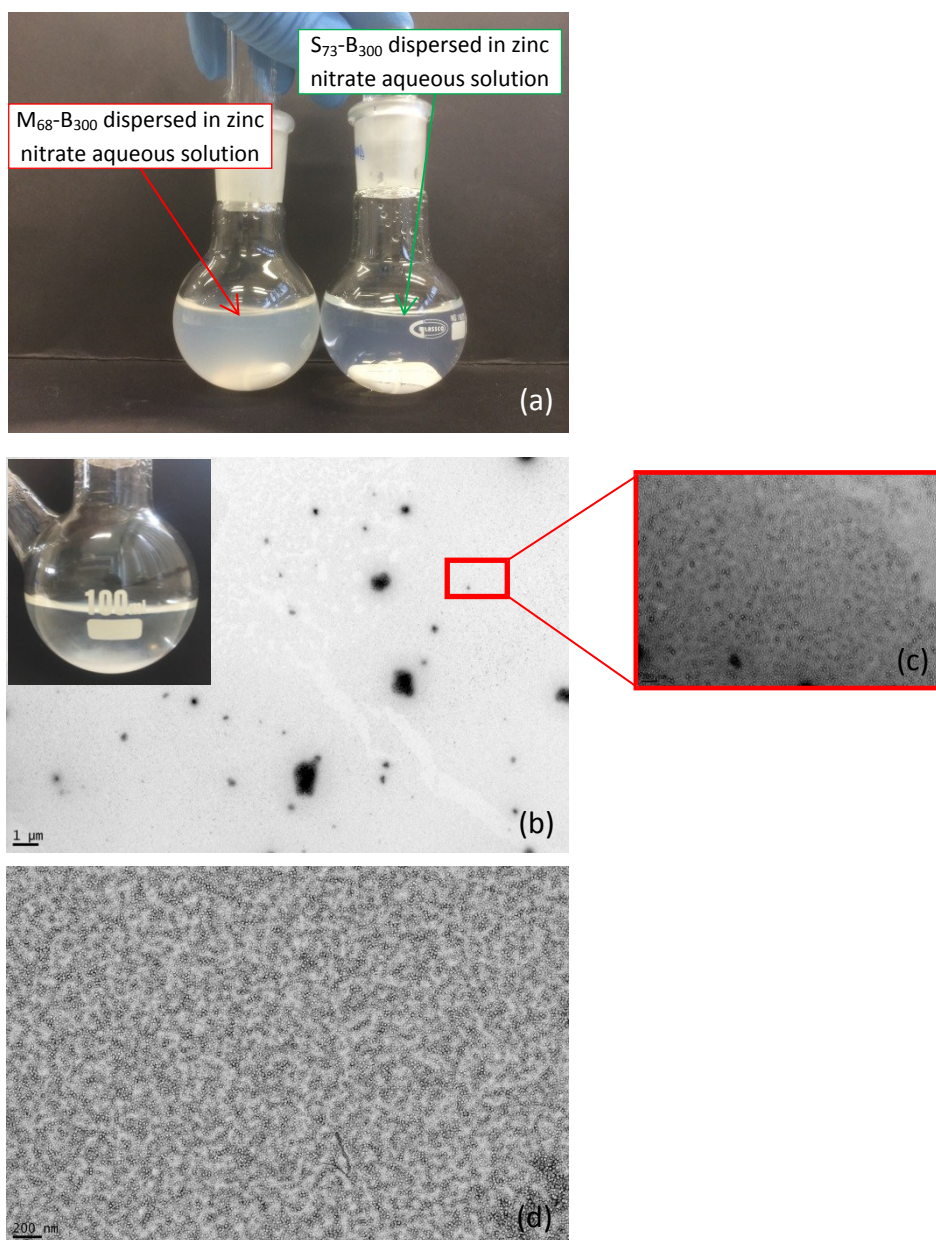

**Figure S4.** (a) Digital photograph recorded for  $0.50 \text{ g dm}^{-3}$  M<sub>68</sub>-B<sub>300</sub> and  $0.50 \text{ g dm}^{-3}$  S<sub>73</sub>-B<sub>300</sub> dispersed in aqueous zinc nitrate solution; (b) TEM images obtained for  $0.50 \text{ g dm}^{-3}$  S<sub>32</sub>-B<sub>300</sub> nanoparticles dispersed in aqueous zinc nitrate solution (inset shows the corresponding digital photograph); (c) magnified image of the area shown in image (b); (d) TEM images of  $0.50 \text{ g dm}^{-3}$  S<sub>73</sub>-B<sub>300</sub> nanoparticles dispersed in aqueous zinc nitrate solution. A white precipitate was formed immediately on addition of S<sub>32</sub>-B<sub>300</sub>, but a stable homogeneous aqueous dispersion is maintained for long time periods (months) in the presence of S<sub>73</sub>-B<sub>300</sub> nanoparticles.

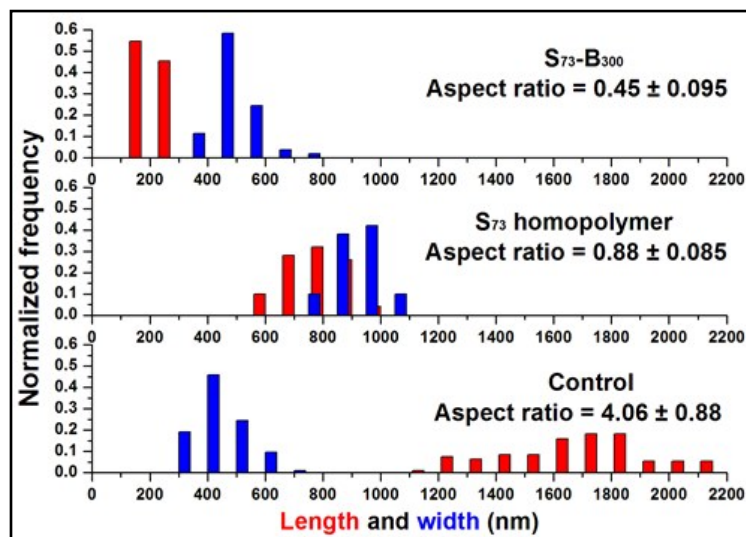

**Figure S5.** Histograms of the length and width comparison for the samples prepared in the absence of any additive (Control),  $S_{73}$  homopolymer, and  $S_{73}\text{-B}_{300}$  nanoparticle.

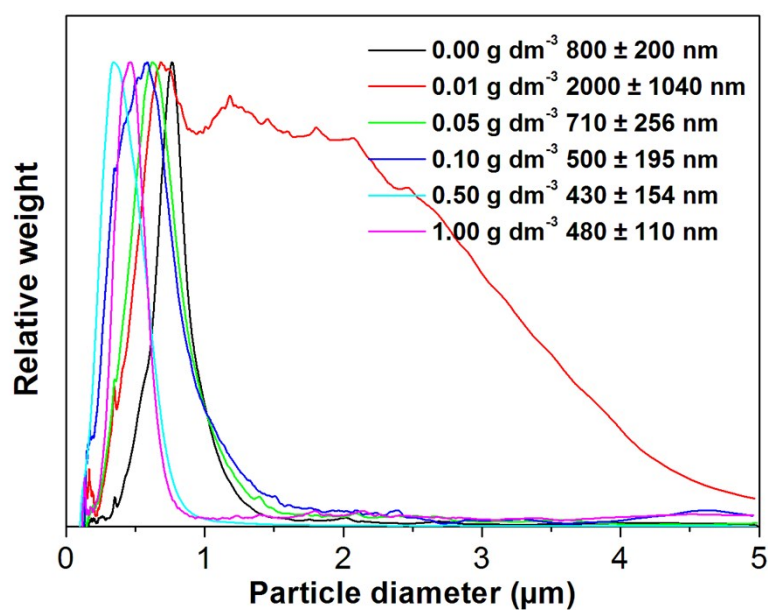

**Figure S6.** Weight-average particle diameters obtained for ZnO particles prepared in the presence of various concentrations of  $S_{73}\text{-B}_{300}$  copolymer nanoparticles, as determined by disk centrifuge photosedimentometry.

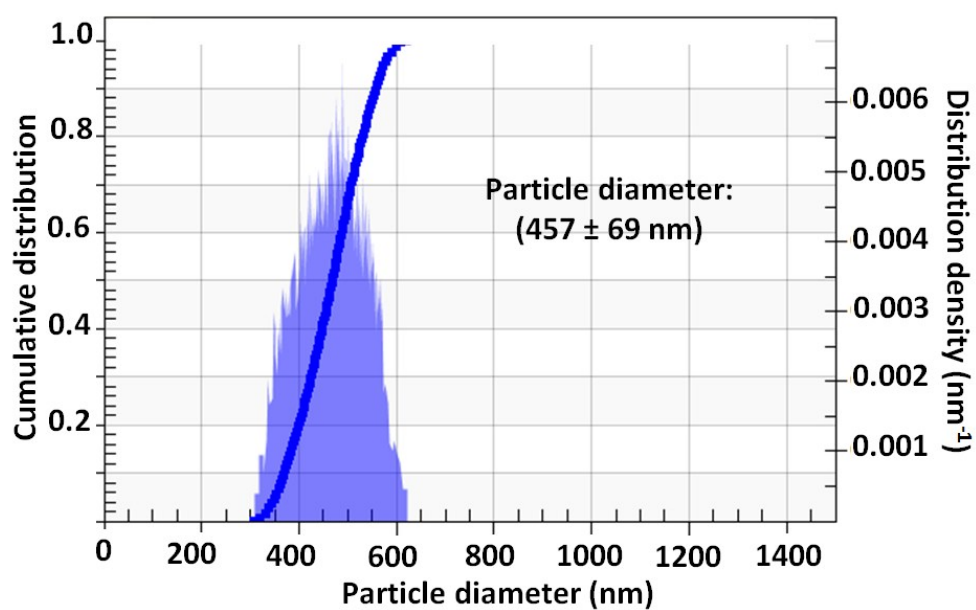

**Figure S7.** Volume-average particle size distribution determined for the S<sub>73</sub>-B<sub>300</sub>/ZnO nanocomposite before calcination, as determined by analytical centrifugation (LUMiSizer® instrument).

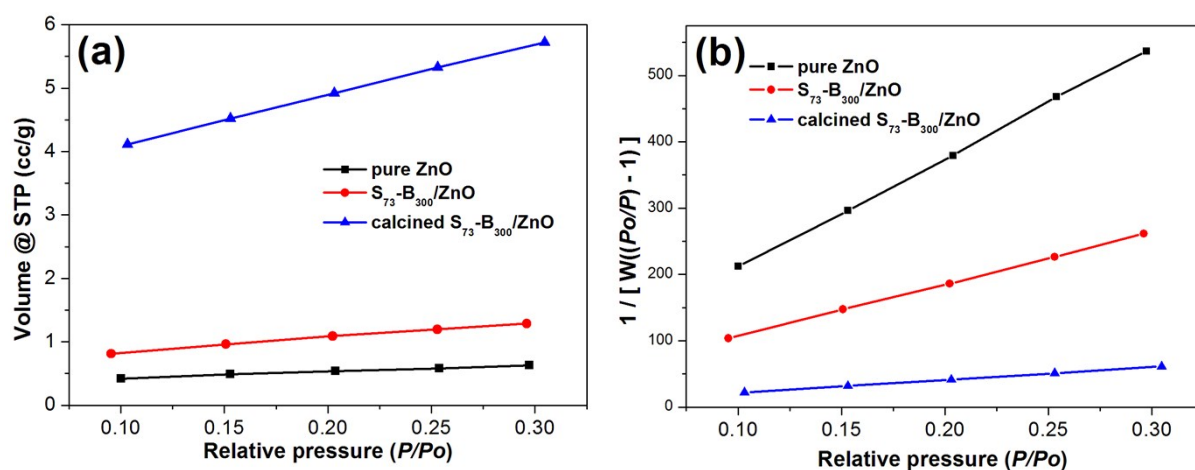

**Figure S8.** (a) Adsorbed volume of  $\text{N}_2$  gas versus relative pressure ( $P/P_o$ ) ranging from 0.10 to 0.30; (b) Linear BET plots of  $1/[W(P_o/P)-1]$  versus  $P/P_o$  ranging from 0.10 to 0.30.

The BET surface area of the pure ZnO,  $S_{73}\text{-B}_{300}/\text{ZnO}$  and calcined  $S_{73}\text{-B}_{300}/\text{ZnO}$  was calculated by  $\text{N}_2$  adsorption (Nova 1000e instrument, Quantachrome). All samples were degassed at 40 °C overnight prior to measurements. The specific surface area (in  $\text{m}^2 \text{g}^{-1}$ ) was determined using the five-point BET method over a relative pressure ( $P/P_o$ ) range of 0.10–0.30.

**Table S1.** Comparison of copolymer contents determined from TGA and carbon microanalyses.

|                             | <b>wt. %</b> | <b>vol. %</b> |
|-----------------------------|--------------|---------------|
| <b>TGA</b>                  | <b>23</b>    | <b>56</b>     |
| <b>Carbon microanalysis</b> | <b>25</b>    | <b>58</b>     |
